# Supplementary material for: Clinicopathological and prognostic value of SIRT6 in patients with solid tumors: a meta-analysis and TCGA data review
Source: Springer Nature journal article supplement (doi:10.1186/s12935-022-02511-3), 2022-02-16
Supplement: MOESM1 [file 20138622]

A

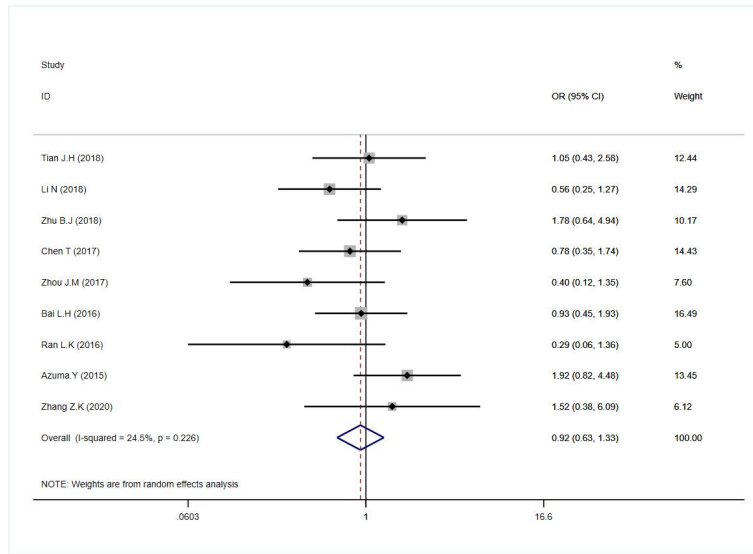

B

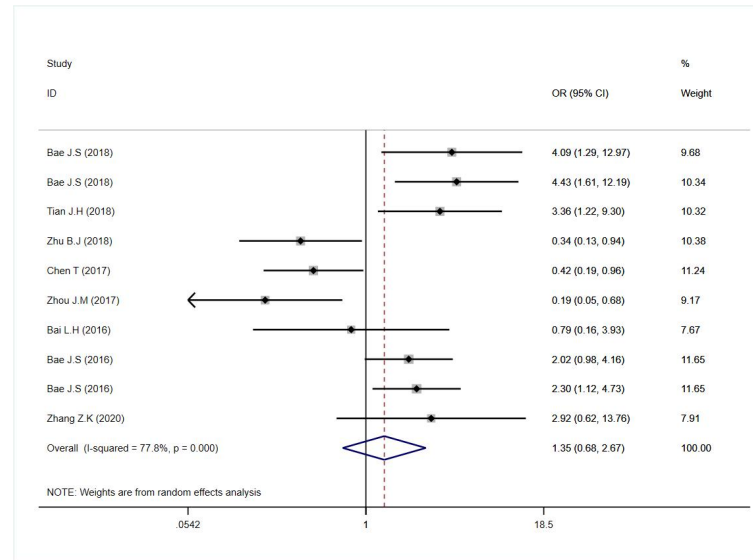

C

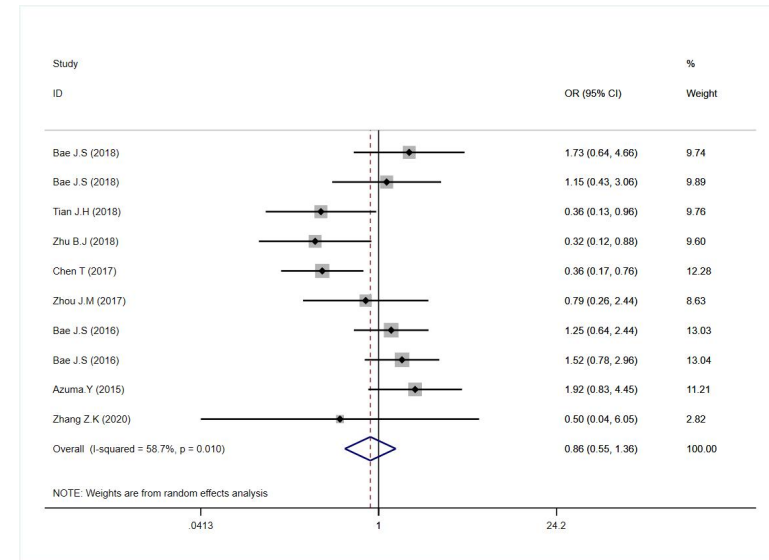

D

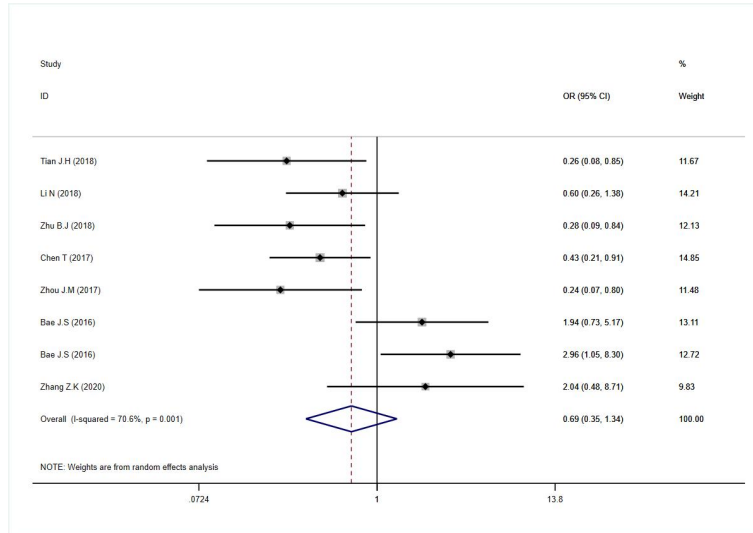

E

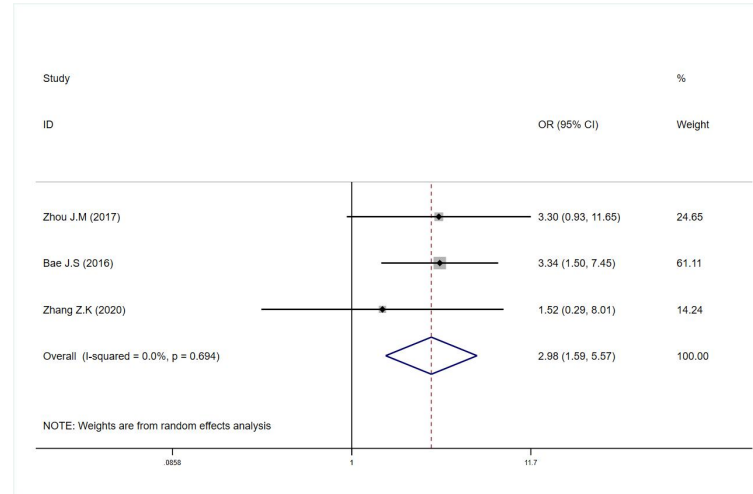

F

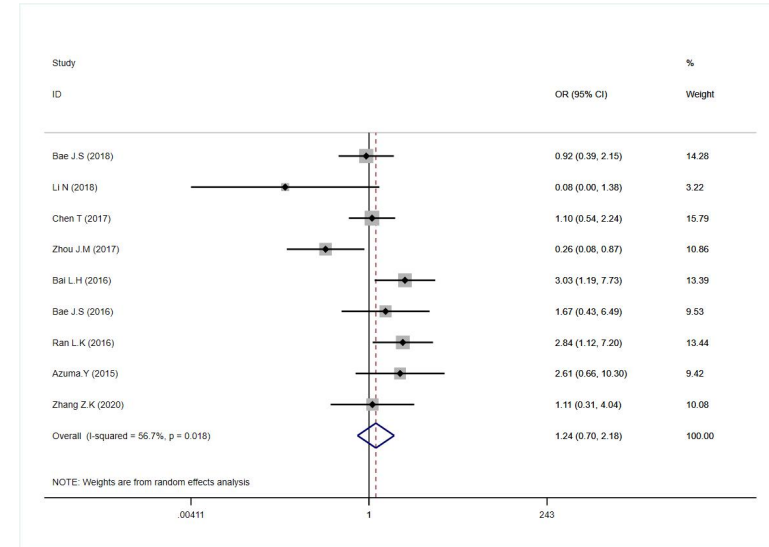

**Figure S1** Forest plot for different clinicopathological parameters. (A) gender; (B) tumor differentiation; (C) Lymph node metastasis; (D) TNM stage; (E) distant metastasis; (F) T stage
