# Supplementary material for: Clinicopathological and prognostic value of SIRT6 in patients with solid tumors: a meta-analysis and TCGA data review
Source: Springer Nature journal article supplement (doi:10.1186/s12935-022-02511-3), 2022-02-16
Supplement: MOESM3 [file 20138622]

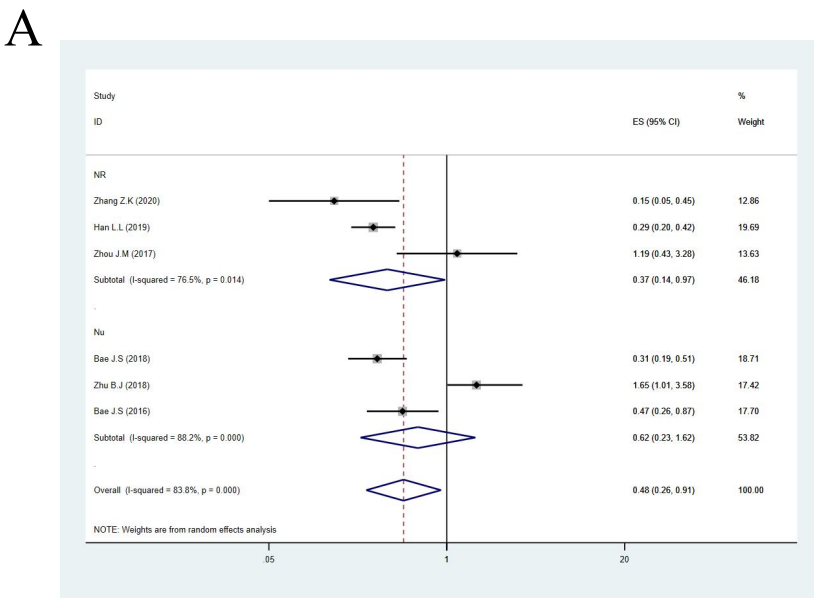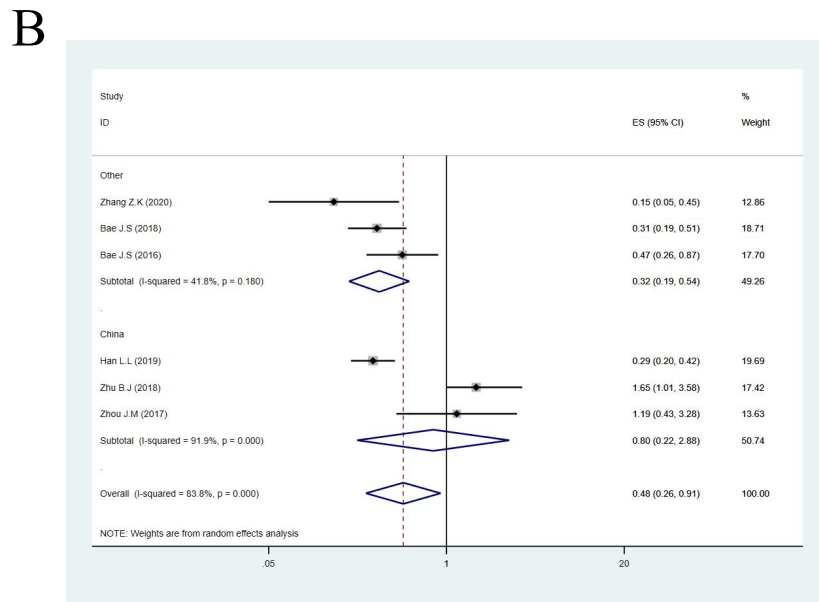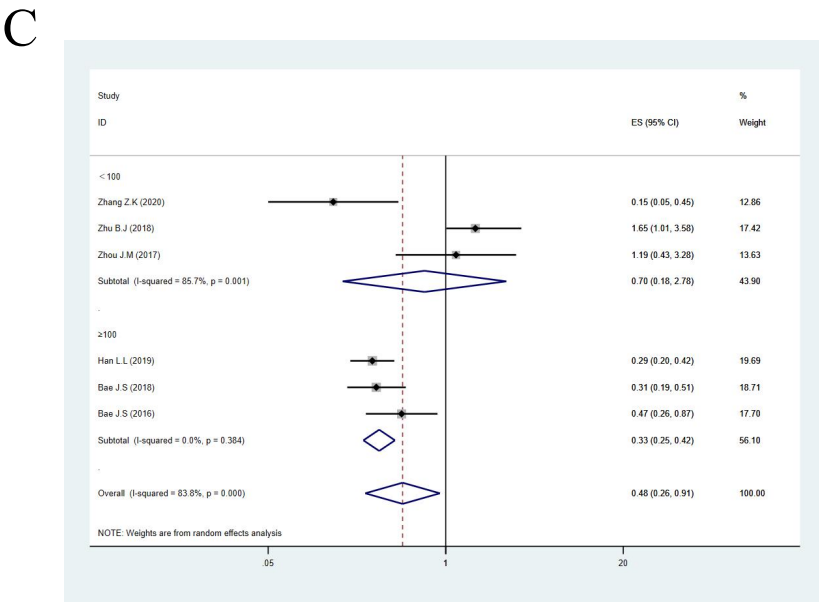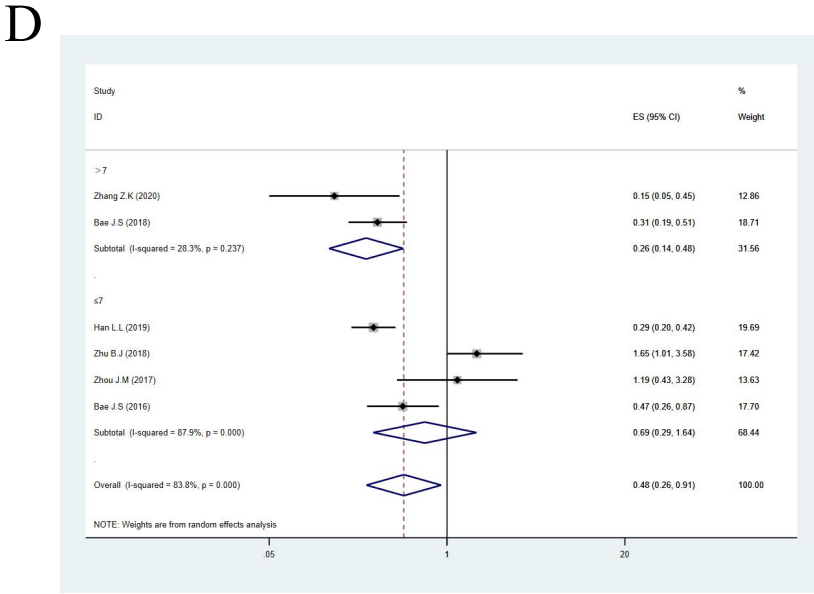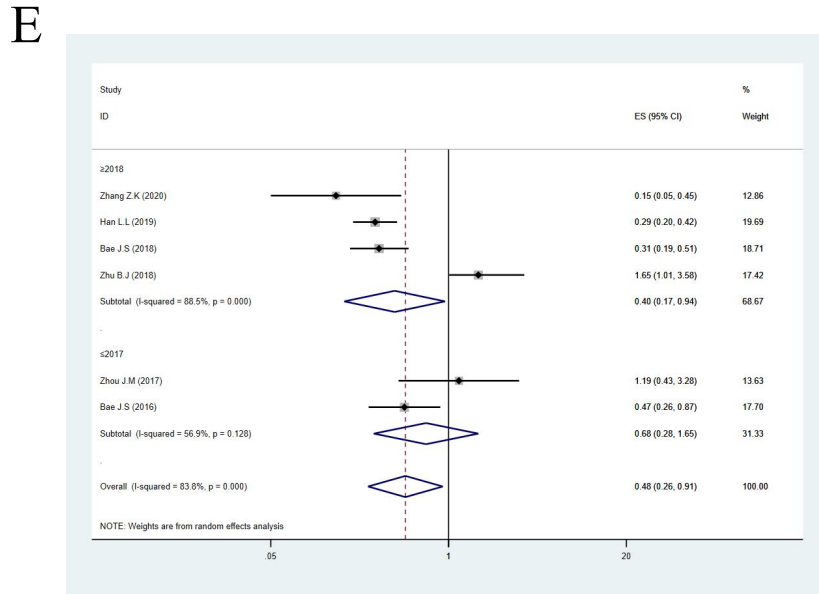

**Figure S3** Forest plot for DFS of different clinicopathological parameters. (A) location; (B) region; (C) patients number; (D) NOS score; (E) publication year
